# Supplementary material for: Diverse mitochondrial abnormalities in a new cellular model of TAFFAZZIN deficiency are remediated by cardiolipin-interacting small molecules
Source: PubMed Central journal article supplement (PMC8384898; doi:10.1016/j.jbc.2021.101005), 2021-07-24
Supplement: mmc1.pdf [file mmc1.pdf]

**Supplementary Information for:**

**Title: Diverse mitochondrial abnormalities in a new cellular model of TAFFAZZIN deficiency are remediated by CL-interacting small molecules**

**Authors:** Arianna F. Anzmann<sup>1</sup>, Olivia L. Sniezek<sup>1</sup>, Alexandra Pado<sup>1</sup>, Veronica Busa<sup>1</sup>, Frédéric M. Vaz<sup>2</sup>, Simion D. Kreimer<sup>3</sup>, Robert N. Cole<sup>3</sup>, Anne Le<sup>4</sup>, Brian J. Kirsch<sup>4</sup>, Steven M. Claypool<sup>5</sup>, Hilary J. Vernon<sup>1\*</sup>

**Corresponding author at:** Department of Genetic Medicine, Johns Hopkins University School of Medicine, 733 N Broadway, MRB 512 Baltimore, Maryland, USA. Email: [hvernon1@jhmi.edu](mailto:hvernon1@jhmi.edu) (H.J. Vernon)

**This PDF file includes:**

Figures S1 to S8

Tables S1 to S6

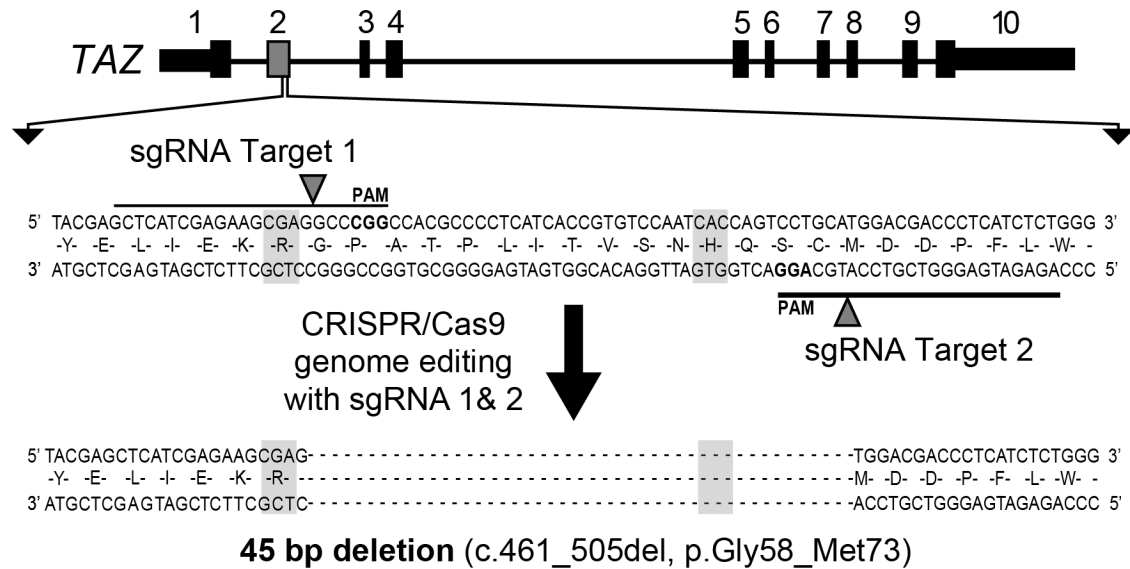

**Figure S1. CRISPR/Cas9 genome editing with two single guide RNAs (sgRNAs) targeting exon 2 of *TAZ* results in a 45 bp deletion.** The 45 bp deletion, noted by dashes, encompasses a predicted acyltransferase domain and covers an area of *TAZ* where multiple pathological variants have been described, such as p.R57L (c.170G>T) and p.H69Q (c.207C>G), highlighted in grey (3).

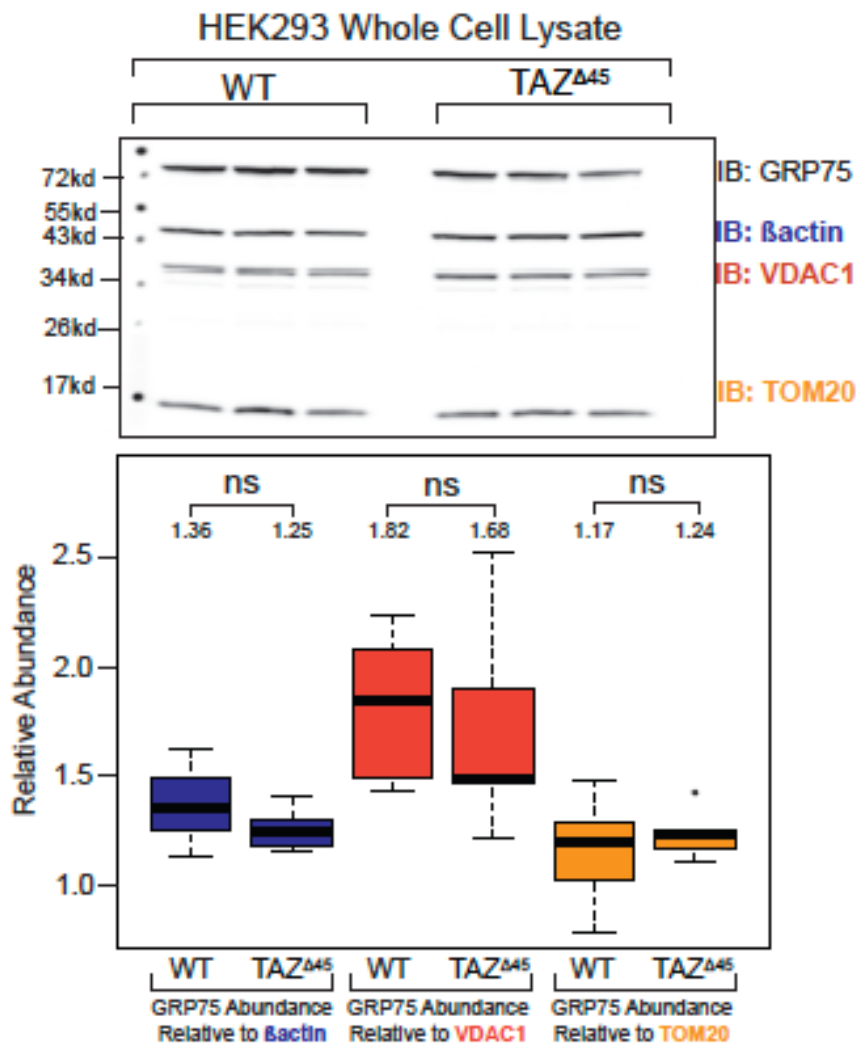

**Figure S2. Comparable abundance of cytosolic and mitochondrial proteins in the absence of TAZ.** Whole cell lysate (40  $\mu$ g) of the indicated lines (A) HEK293 cells were immunoblotted for the indicated proteins. Band intensities were quantified and plotted relative to  $\beta$ -actin (blue), VDAC1 (red), and TOM20 (yellow); WT n=9, TAZ<sup>Δ45</sup> n=9.

**Table S1. CRISPR/Cas9 sgRNA guide sequences and predicted off-target sites.**

| sgRNA       | Guide Sequence (5' to 3')                    | Off-Targets (5' to 3')  | Score <sup>1</sup> | MMs <sup>2</sup> | Hg38 Location    | Sequenced? |
|-------------|----------------------------------------------|-------------------------|--------------------|------------------|------------------|------------|
| Target<br>1 | GCTCATCGAGAAGCGAGGCC <b>CGG</b> <sup>3</sup> | GCCCGTCAAGAAGCGAGGCCAG  | 2.4                | 3                | chr9:-136416984  | Y          |
|             |                                              | GCTCATTGTTAAGCGAGGCCTAG | 0.9                | 3                | chr5:-164071618  | Y          |
|             |                                              | CTTCAGCCAGAAGCGAGGCCAAG | 0.8                | 4                | chr13:+111688858 | Y          |
|             |                                              | CCCCATCGAGAAGCGCGGCCAAG | 0.6                | 3                | chr4:-132956077  | N          |
|             |                                              | GCCCATCGGGAAGCCAGGCCGAG | 0.5                | 3                | chr18:-8629183   | N          |
| Target<br>2 | GAGATGAGGGTCGTCATGC <b>AGG</b> <sup>3</sup>  | GAGATGTAGCTCGTCCATGCTGG | 1.5                | 3                | chr3:+173436340  | Y          |
|             |                                              | GTTCAGAGGGTCGTCATGCAAG  | 1.3                | 3                | chr7:-70923313   | Y          |
|             |                                              | GATATGAGGGGAGTCCATGCAGG | 0.7                | 3                | chrX:-12667869   | N          |
|             |                                              | GACAAGAGGTTGGTCCATGCCAG | 0.6                | 4                | chr7:+65692780   | N          |
|             |                                              | CTGGTGAGGGTCTTCCATGCCAG | 0.6                | 4                | chr8:-125971306  | N          |

<sup>1</sup> Off-target score calculated at [crispr.mit.edu](http://crispr.mit.edu) based on scoring algorithm from Hsu et al. 2013 (2)

<sup>2</sup> The number of mismatches between the guide sequence and the "off-target" sequence

<sup>3</sup> PAM site is bolded

**Table S2A. Significant KEGG & GO terms determined by functional annotation analysis of the proteins with a FC  $\leq$  0.80 (n=215).**

|                                                                  | # OF GENES <sup>1</sup> | % <sup>2</sup> | P-VALUE <sup>3</sup> | FOLD ENRICHMENT |
|------------------------------------------------------------------|-------------------------|----------------|----------------------|-----------------|
| <b>KEGG PATHWAYS</b>                                             |                         |                |                      |                 |
| Parkinson's disease                                              | 13                      | 6.1            | 6.80E-08             | 7.8             |
| Oxidative phosphorylation*                                       | 11                      | 5.1            | 2.70E-06             | 7               |
| Huntington's disease                                             | 11                      | 5.1            | 6.80E-05             | 4.9             |
| Alzheimer's disease                                              | 10                      | 4.7            | 1.30E-04             | 5.1             |
| Non-alcoholic fatty liver disease (NAFLD)                        | 9                       | 4.2            | 3.40E-04             | 5.1             |
| Cardiac muscle contraction                                       | 6                       | 2.8            | 1.70E-03             | 6.8             |
| Bile secretion                                                   | 5                       | 2.3            | 8.30E-03             | 6.2             |
| Dilated cardiomyopathy                                           | 5                       | 2.3            | 1.60E-02             | 5.1             |
| Metabolic pathways*                                              | 23                      | 10.7           | 1.90E-02             | 1.6             |
| Ribosome                                                         | 6                       | 2.8            | 2.10E-02             | 3.7             |
| <b>GO TERMS: BIOLOGICAL PROCESSES</b>                            |                         |                |                      |                 |
| platelet degranulation                                           | 10                      | 4.7            | 2.60E-06             | 8.5             |
| mitochondrial respiratory chain complex I assembly**             | 7                       | 3.3            | 7.90E-05             | 9.7             |
| mitochondrial electron transport, NADH to ubiquinone**           | 6                       | 2.8            | 2.30E-04             | 10.7            |
| actin filament organization                                      | 6                       | 2.8            | 1.40E-03             | 7.3             |
| response to oxidative stress                                     | 7                       | 3.3            | 1.60E-03             | 5.6             |
| protein lipoylation                                              | 3                       | 1.4            | 2.60E-03             | 37.5            |
| negative regulation of endothelial cell proliferation            | 4                       | 1.9            | 4.30E-03             | 12.1            |
| negative regulation of ATPase activity*                          | 3                       | 1.4            | 5.50E-03             | 26.2            |
| aerobic respiration*                                             | 4                       | 1.9            | 6.10E-03             | 10.6            |
| protein targeting to mitochondrion*                              | 4                       | 1.9            | 6.70E-03             | 10.3            |
| muscle contraction                                               | 6                       | 2.8            | 7.50E-03             | 4.9             |
| muscle filament sliding                                          | 4                       | 1.9            | 9.10E-03             | 9.2             |
| retina homeostasis                                               | 4                       | 1.9            | 1.10E-02             | 8.7             |
| rRNA processing                                                  | 8                       | 3.7            | 1.10E-02             | 3.3             |
| wound healing                                                    | 5                       | 2.3            | 1.30E-02             | 5.5             |
| Ossification                                                     | 5                       | 2.3            | 1.30E-02             | 5.5             |
| cellular response to interferon-beta                             | 3                       | 1.4            | 1.40E-02             | 16.4            |
| ribosomal small subunit biogenesis                               | 3                       | 1.4            | 1.40E-02             | 16.4            |
| mitochondrial electron transport, cytochrome c to oxygen*        | 3                       | 1.4            | 2.10E-02             | 13.1            |
| SRP-dependent cotranslational protein targeting to membrane      | 5                       | 2.3            | 2.20E-02             | 4.7             |
| Translation                                                      | 8                       | 3.7            | 2.60E-02             | 2.8             |
| cellular response to vascular endothelial growth factor stimulus | 3                       | 1.4            | 2.80E-02             | 11.4            |
| response to calcium ion                                          | 4                       | 1.9            | 2.80E-02             | 6               |

|                                                                     |    |      |          |      |
|---------------------------------------------------------------------|----|------|----------|------|
| response to electrical stimulus                                     | 3  | 1.4  | 3.00E-02 | 10.9 |
| positive regulation of osteoblast differentiation                   | 4  | 1.9  | 3.10E-02 | 5.8  |
| cytoplasmic translation                                             | 3  | 1.4  | 3.30E-02 | 10.5 |
| ribosomal large subunit biogenesis                                  | 3  | 1.4  | 3.30E-02 | 10.5 |
| viral transcription                                                 | 5  | 2.3  | 3.90E-02 | 3.9  |
| positive regulation of phagocytosis                                 | 3  | 1.4  | 4.30E-02 | 9    |
| sarcomere organization                                              | 3  | 1.4  | 4.30E-02 | 9    |
| one-carbon metabolic process*                                       | 3  | 1.4  | 4.50E-02 | 8.7  |
| nuclear-transcribed mRNA catabolic process, nonsense-mediated decay | 5  | 2.3  | 4.70E-02 | 3.7  |
| vascular endothelial growth factor receptor signaling pathway       | 4  | 1.9  | 4.90E-02 | 4.9  |
| <b>GO TERMS: CELLULAR COMPARTMENTS</b>                              |    |      |          |      |
| mitochondrion*                                                      | 42 | 19.6 | 2.30E-09 | 2.8  |
| mitochondrial inner membrane*                                       | 20 | 9.3  | 5.80E-07 | 4    |
| extracellular exosome                                               | 55 | 25.7 | 3.10E-05 | 1.7  |
| prefoldin complex                                                   | 4  | 1.9  | 4.70E-05 | 50.8 |
| mitochondrial respiratory chain complex I**                         | 6  | 2.8  | 2.10E-04 | 10.9 |
| platelet alpha granule lumen                                        | 6  | 2.8  | 3.70E-04 | 9.7  |
| Cytosol                                                             | 57 | 26.6 | 6.90E-04 | 1.5  |
| Cytoskeleton                                                        | 13 | 6.1  | 1.00E-03 | 3.1  |
| cell surface                                                        | 16 | 7.5  | 1.20E-03 | 2.6  |
| focal adhesion                                                      | 13 | 6.1  | 1.60E-03 | 3    |
| mitochondrial proton-transporting ATP synthase complex*             | 4  | 1.9  | 1.60E-03 | 16.9 |
| mitochondrial membrane*                                             | 6  | 2.8  | 4.10E-03 | 5.7  |
| actin filament                                                      | 5  | 2.3  | 6.10E-03 | 6.8  |
| cytosolic large ribosomal subunit                                   | 5  | 2.3  | 7.10E-03 | 6.5  |
| basement membrane                                                   | 5  | 2.3  | 1.20E-02 | 5.6  |
| Costamere                                                           | 3  | 1.4  | 1.90E-02 | 14   |
| integral component of mitochondrial inner membrane*                 | 3  | 1.4  | 2.10E-02 | 13.3 |
| respiratory chain*                                                  | 3  | 1.4  | 2.10E-02 | 13.3 |
| stress fiber                                                        | 4  | 1.9  | 2.30E-02 | 6.6  |
| Microvillus                                                         | 4  | 1.9  | 2.60E-02 | 6.2  |
| M band                                                              | 3  | 1.4  | 2.70E-02 | 11.6 |
| blood microparticle                                                 | 6  | 2.8  | 2.80E-02 | 3.5  |
| myelin sheath                                                       | 6  | 2.8  | 2.80E-02 | 3.5  |
| Cytoplasm                                                           | 72 | 33.6 | 3.20E-02 | 1.2  |
| Microspike                                                          | 2  | 0.9  | 3.30E-02 | 59.3 |
| granular component                                                  | 2  | 0.9  | 4.40E-02 | 44.4 |
| muscle thin filament tropomyosin                                    | 2  | 0.9  | 4.40E-02 | 44.4 |
| apical plasma membrane                                              | 8  | 3.7  | 4.60E-02 | 2.4  |

|                                                                                                                                                                                                                                                        |     |      |          |      |
|--------------------------------------------------------------------------------------------------------------------------------------------------------------------------------------------------------------------------------------------------------|-----|------|----------|------|
| filamentous actin                                                                                                                                                                                                                                      | 3   | 1.4  | 4.70E-02 | 8.6  |
| extracellular matrix                                                                                                                                                                                                                                   | 8   | 3.7  | 4.90E-02 | 2.4  |
| <b>GO TERMS: MOLECULAR FUNCTIONS</b>                                                                                                                                                                                                                   |     |      |          |      |
| structural constituent of muscle                                                                                                                                                                                                                       | 6   | 2.8  | 1.10E-04 | 12.6 |
| protein binding                                                                                                                                                                                                                                        | 125 | 58.4 | 2.00E-04 | 1.3  |
| actin filament binding                                                                                                                                                                                                                                 | 8   | 3.7  | 7.60E-04 | 5.3  |
| unfolded protein binding                                                                                                                                                                                                                               | 7   | 3.3  | 1.60E-03 | 5.6  |
| NADH dehydrogenase (ubiquinone) activity *#                                                                                                                                                                                                            | 5   | 2.3  | 2.10E-03 | 9.2  |
| poly(A) RNA binding                                                                                                                                                                                                                                    | 25  | 11.7 | 2.10E-03 | 1.9  |
| structural constituent of ribosome                                                                                                                                                                                                                     | 9   | 4.2  | 3.80E-03 | 3.6  |
| endopeptidase inhibitor activity                                                                                                                                                                                                                       | 4   | 1.9  | 1.00E-02 | 8.8  |
| identical protein binding                                                                                                                                                                                                                              | 17  | 7.9  | 1.10E-02 | 2    |
| structural molecule activity conferring elasticity                                                                                                                                                                                                     | 2   | 0.9  | 2.30E-02 | 87.9 |
| structural constituent of cytoskeleton                                                                                                                                                                                                                 | 5   | 2.3  | 3.60E-02 | 4    |
| ubiquitin conjugating enzyme activity                                                                                                                                                                                                                  | 3   | 1.4  | 4.20E-02 | 9.1  |
| cytochrome-c oxidase activity *                                                                                                                                                                                                                        | 3   | 1.4  | 4.50E-02 | 8.8  |
| * References mitochondrion and/or metabolic pathways (n=18)<br># References complex I of the oxidative phosphorylation pathways (n=4)                                                                                                                  |     |      |          |      |
| <sup>1</sup> The number of input proteins involved in the term<br><sup>2</sup> The number of input proteins involved in the term divided by the total proteins/genes represented by the term<br><sup>3</sup> Modified Fisher Exact p-value, EASE Score |     |      |          |      |

**Table S2B. Significant KEGG & GO terms determined by functional annotation analysis of the proteins with a FC  $\geq$  1.20 (n=621).**

|                                       | # OF GENES <sup>1</sup> | % <sup>2</sup> | P-VALUE <sup>3</sup> | FOLD ENRICHMENT |
|---------------------------------------|-------------------------|----------------|----------------------|-----------------|
| <b>KEGG PATHWAYS</b>                  |                         |                |                      |                 |
| Chronic myeloid leukemia              | 9                       | 1.4            | 2.50E-03             | 3.8             |
| Metabolic pathways*                   | 58                      | 9.3            | 3.10E-03             | 1.4             |
| Pancreatic cancer                     | 8                       | 1.3            | 5.40E-03             | 3.7             |
| AMPK signaling pathway                | 11                      | 1.8            | 7.50E-03             | 2.7             |
| Alzheimer's disease                   | 13                      | 2.1            | 9.70E-03             | 2.3             |
| Butanoate metabolism*                 | 5                       | 0.8            | 1.10E-02             | 5.6             |
| Carbohydrate digestion and absorption | 6                       | 1              | 1.20E-02             | 4.3             |
| Endocytosis                           | 16                      | 2.6            | 1.40E-02             | 2               |
| Insulin signaling pathway             | 11                      | 1.8            | 1.60E-02             | 2.4             |
| Colorectal cancer                     | 7                       | 1.1            | 1.60E-02             | 3.4             |
| Fatty acid metabolism*                | 6                       | 1              | 2.10E-02             | 3.8             |
| Notch signaling pathway               | 6                       | 1              | 2.10E-02             | 3.8             |

|                                                                                                                   |    |     |          |      |
|-------------------------------------------------------------------------------------------------------------------|----|-----|----------|------|
| Amino sugar and nucleotide sugar metabolism*                                                                      | 6  | 1   | 2.10E-02 | 3.8  |
| p53 signaling pathway                                                                                             | 7  | 1.1 | 2.30E-02 | 3.1  |
| Biosynthesis of antibiotics                                                                                       | 14 | 2.3 | 2.30E-02 | 2    |
| Phagosome                                                                                                         | 11 | 1.8 | 2.70E-02 | 2.2  |
| Adipocytokine signaling pathway                                                                                   | 7  | 1.1 | 2.80E-02 | 3    |
| Inositol phosphate metabolism*                                                                                    | 7  | 1.1 | 3.00E-02 | 3    |
| Proteoglycans in cancer                                                                                           | 13 | 2.1 | 3.30E-02 | 2    |
| Biosynthesis of unsaturated fatty acids                                                                           | 4  | 0.6 | 3.90E-02 | 5.2  |
| Viral myocarditis                                                                                                 | 6  | 1   | 4.00E-02 | 3.2  |
| Synthesis and degradation of ketone bodies                                                                        | 3  | 0.5 | 4.10E-02 | 9    |
| Phosphatidylinositol signaling system                                                                             | 8  | 1.3 | 4.30E-02 | 2.5  |
| Glucagon signaling pathway                                                                                        | 8  | 1.3 | 4.60E-02 | 2.4  |
| Cell adhesion molecules (CAMs)                                                                                    | 10 | 1.6 | 4.60E-02 | 2.1  |
| Fatty acid elongation                                                                                             | 4  | 0.6 | 4.80E-02 | 4.8  |
| Epstein-Barr virus infection                                                                                      | 9  | 1.4 | 4.90E-02 | 2.2  |
| <b>GO TERMS: BIOLOGICAL PROCESSES</b>                                                                             |    |     |          |      |
| covalent chromatin modification                                                                                   | 14 | 2.3 | 7.30E-05 | 3.8  |
| viral genome replication                                                                                          | 5  | 0.8 | 8.40E-04 | 11   |
| protein targeting to plasma membrane                                                                              | 6  | 1   | 1.30E-03 | 7.1  |
| antigen processing and presentation of endogenous peptide antigen via MHC class I via ER pathway, TAP-independent | 3  | 0.5 | 3.10E-03 | 30.9 |
| positive regulation of apoptotic process*                                                                         | 20 | 3.2 | 4.20E-03 | 2.1  |
| carbohydrate phosphorylation                                                                                      | 5  | 0.8 | 5.90E-03 | 6.7  |
| cell cycle arrest                                                                                                 | 12 | 1.9 | 6.10E-03 | 2.6  |
| response to oxidative stress*                                                                                     | 10 | 1.6 | 9.30E-03 | 2.8  |
| cell migration                                                                                                    | 13 | 2.1 | 1.00E-02 | 2.3  |
| phosphatidylinositol biosynthetic process                                                                         | 7  | 1.1 | 1.10E-02 | 3.7  |
| long-chain fatty-acyl-CoA biosynthetic process                                                                    | 6  | 1   | 1.10E-02 | 4.4  |
| macroautophagy*                                                                                                   | 8  | 1.3 | 1.10E-02 | 3.2  |
| unsaturated fatty acid biosynthetic process                                                                       | 4  | 0.6 | 1.10E-02 | 8.2  |
| muscle cell differentiation                                                                                       | 4  | 0.6 | 1.10E-02 | 8.2  |
| IRE1-mediated unfolded protein response                                                                           | 7  | 1.1 | 1.20E-02 | 3.7  |
| positive regulation of DNA binding                                                                                | 5  | 0.8 | 1.20E-02 | 5.5  |
| tRNA pseudouridine synthesis                                                                                      | 3  | 0.5 | 1.40E-02 | 15.4 |
| magnesium ion homeostasis                                                                                         | 3  | 0.5 | 1.40E-02 | 15.4 |
| antigen processing and presentation of peptide antigen via MHC class I                                            | 5  | 0.8 | 1.50E-02 | 5.1  |
| neuron projection development                                                                                     | 9  | 1.4 | 1.60E-02 | 2.8  |
| positive regulation of substrate adhesion-dependent cell spreading                                                | 5  | 0.8 | 1.90E-02 | 4.8  |
| membrane protein intracellular domain proteolysis                                                                 | 4  | 0.6 | 1.90E-02 | 6.9  |
| cilium assembly                                                                                                   | 10 | 1.6 | 1.90E-02 | 2.5  |



|                                                                                                   |     |      |          |      |
|---------------------------------------------------------------------------------------------------|-----|------|----------|------|
| regulation of apoptotic process*                                                                  | 14  | 2.3  | 2.10E-02 | 2    |
| inner ear receptor stereocilium organization                                                      | 4   | 0.6  | 2.20E-02 | 6.5  |
| regulation of autophagy*                                                                          | 6   | 1    | 2.20E-02 | 3.7  |
| amyloid precursor protein catabolic process                                                       | 3   | 0.5  | 2.60E-02 | 11.6 |
| response to cholesterol                                                                           | 3   | 0.5  | 2.60E-02 | 11.6 |
| interferon-gamma-mediated signaling pathway                                                       | 7   | 1.1  | 2.70E-02 | 3    |
| protein maturation by protein folding                                                             | 3   | 0.5  | 3.20E-02 | 10.3 |
| pyrimidine nucleotide metabolic process*                                                          | 3   | 0.5  | 3.20E-02 | 10.3 |
| DNA topological change                                                                            | 3   | 0.5  | 3.20E-02 | 10.3 |
| antigen processing and presentation of exogenous peptide antigen via MHC class I, TAP-independent | 3   | 0.5  | 3.20E-02 | 10.3 |
| cilium morphogenesis                                                                              | 10  | 1.6  | 3.30E-02 | 2.3  |
| cell growth                                                                                       | 6   | 1    | 3.40E-02 | 3.3  |
| viral process                                                                                     | 17  | 2.7  | 3.40E-02 | 1.8  |
| purine nucleotide metabolic process*                                                              | 3   | 0.5  | 4.00E-02 | 9.3  |
| regulation of synaptic vesicle exocytosis                                                         | 3   | 0.5  | 4.00E-02 | 9.3  |
| cell volume homeostasis                                                                           | 3   | 0.5  | 4.00E-02 | 9.3  |
| nucleocytoplasmic transport                                                                       | 4   | 0.6  | 4.60E-02 | 4.9  |
| positive regulation of stress fiber assembly*                                                     | 5   | 0.8  | 4.60E-02 | 3.7  |
| UDP-N-acetylglucosamine biosynthetic process                                                      | 3   | 0.5  | 4.70E-02 | 8.4  |
| positive regulation of histone deacetylation                                                      | 3   | 0.5  | 4.70E-02 | 8.4  |
| chromatin organization                                                                            | 5   | 0.8  | 4.90E-02 | 3.6  |
| histone H3 acetylation                                                                            | 5   | 0.8  | 4.90E-02 | 3.6  |
| glycosaminoglycan catabolic process                                                               | 4   | 0.6  | 5.00E-02 | 4.7  |
| <b>GO TERMS: CELLULAR COMPARTMENTS</b>                                                            |     |      |          |      |
| extracellular exosome                                                                             | 135 | 21.7 | 1.70E-06 | 1.5  |
| membrane                                                                                          | 110 | 17.7 | 3.70E-06 | 1.5  |
| endoplasmic reticulum                                                                             | 51  | 8.2  | 1.90E-05 | 1.9  |
| mitochondrion*                                                                                    | 68  | 11   | 2.20E-04 | 1.6  |
| cytosol                                                                                           | 142 | 22.9 | 2.80E-04 | 1.3  |
| cytoplasm                                                                                         | 206 | 33.2 | 7.60E-04 | 1.2  |
| nucleoplasm                                                                                       | 120 | 19.3 | 8.10E-04 | 1.3  |
| integral component of endoplasmic reticulum membrane                                              | 11  | 1.8  | 2.00E-03 | 3.3  |
| integral component of luminal side of endoplasmic reticulum membrane                              | 6   | 1    | 2.20E-03 | 6.4  |
| phagocytic vesicle membrane                                                                       | 8   | 1.3  | 2.90E-03 | 4.2  |
| endoplasmic reticulum membrane                                                                    | 44  | 7.1  | 3.60E-03 | 1.6  |
| intermediate filament                                                                             | 11  | 1.8  | 3.80E-03 | 3    |
| ruffle membrane                                                                                   | 9   | 1.4  | 5.10E-03 | 3.4  |
| mitochondrial inner membrane*                                                                     | 26  | 4.2  | 5.20E-03 | 1.8  |
| ER to Golgi transport vesicle membrane                                                            | 7   | 1.1  | 6.60E-03 | 4.1  |

|                                                                     |     |      |          |      |
|---------------------------------------------------------------------|-----|------|----------|------|
| mitochondrial intermembrane space*                                  | 8   | 1.3  | 1.00E-02 | 3.3  |
| myelin sheath                                                       | 12  | 1.9  | 1.10E-02 | 2.4  |
| nucleus                                                             | 202 | 32.5 | 1.30E-02 | 1.1  |
| melanosome                                                          | 9   | 1.4  | 1.70E-02 | 2.7  |
| early endosome                                                      | 15  | 2.4  | 1.80E-02 | 2    |
| Golgi membrane                                                      | 30  | 4.8  | 1.80E-02 | 1.6  |
| centrosome                                                          | 23  | 3.7  | 2.20E-02 | 1.7  |
| costamere                                                           | 4   | 0.6  | 2.20E-02 | 6.5  |
| endoplasmic reticulum-Golgi intermediate compartment                | 7   | 1.1  | 2.30E-02 | 3.2  |
| endoplasmic reticulum lumen                                         | 13  | 2.1  | 2.30E-02 | 2.1  |
| cilium                                                              | 11  | 1.8  | 2.60E-02 | 2.2  |
| autolysosome                                                        | 3   | 0.5  | 2.60E-02 | 11.5 |
| ER-mitochondrion membrane contact site*                             | 3   | 0.5  | 2.60E-02 | 11.5 |
| integral component of mitochondrial outer membrane*                 | 4   | 0.6  | 2.90E-02 | 5.9  |
| stress fiber*                                                       | 6   | 1    | 3.00E-02 | 3.4  |
| F-actin capping protein complex                                     | 3   | 0.5  | 3.30E-02 | 10.2 |
| nuclear heterochromatin                                             | 4   | 0.6  | 3.30E-02 | 5.6  |
| lysosomal membrane                                                  | 16  | 2.6  | 3.50E-02 | 1.8  |
| early endosome membrane                                             | 9   | 1.4  | 3.50E-02 | 2.4  |
| Golgi apparatus                                                     | 39  | 6.3  | 3.60E-02 | 1.4  |
| oligosaccharyltransferase complex                                   | 3   | 0.5  | 4.00E-02 | 9.2  |
| dendrite                                                            | 18  | 2.9  | 4.70E-02 | 1.7  |
| MHC class I protein complex                                         | 3   | 0.5  | 4.80E-02 | 8.4  |
| <b>GO TERMS: MOLECULAR FUNCTIONS</b>                                |     |      |          |      |
| protein binding                                                     | 335 | 53.9 | 2.90E-05 | 1.2  |
| poly(A) RNA binding                                                 | 55  | 8.9  | 3.10E-03 | 1.5  |
| AP-3 adaptor complex binding                                        | 3   | 0.5  | 3.10E-03 | 30.5 |
| TAP binding                                                         | 3   | 0.5  | 3.10E-03 | 30.5 |
| nucleosomal DNA binding                                             | 7   | 1.1  | 3.70E-03 | 4.6  |
| cysteine-type endopeptidase activity involved in apoptotic process* | 4   | 0.6  | 7.80E-03 | 9.4  |
| chromatin binding                                                   | 23  | 3.7  | 9.80E-03 | 1.8  |
| 1-phosphatidylinositol-3-phosphate 4-kinase activity                | 3   | 0.5  | 1.00E-02 | 18.3 |
| GTPase activity                                                     | 16  | 2.6  | 1.00E-02 | 2.1  |
| peptide antigen binding                                             | 5   | 0.8  | 1.20E-02 | 5.5  |
| GTP binding                                                         | 22  | 3.5  | 1.50E-02 | 1.7  |
| histone binding                                                     | 10  | 1.6  | 1.90E-02 | 2.5  |
| scaffold protein binding                                            | 6   | 1    | 2.00E-02 | 3.8  |
| 1-phosphatidylinositol-4-phosphate 5-kinase activity                | 3   | 0.5  | 2.00E-02 | 13.1 |
| chromatin DNA binding                                               | 6   | 1    | 4.10E-02 | 3.2  |

|                                                                                                                                                                                                                                                        |   |   |          |   |
|--------------------------------------------------------------------------------------------------------------------------------------------------------------------------------------------------------------------------------------------------------|---|---|----------|---|
| cysteine-type endopeptidase activity                                                                                                                                                                                                                   | 6 | 1 | 4.90E-02 | 3 |
| * References mitochondrion and/or mitochondrial dynamics (n=20)                                                                                                                                                                                        |   |   |          |   |
| <sup>1</sup> The number of input proteins involved in the term<br><sup>2</sup> The number of input proteins involved in the term divided by the total proteins/genes represented by the term<br><sup>3</sup> Modified Fisher Exact p-value, EASE Score |   |   |          |   |

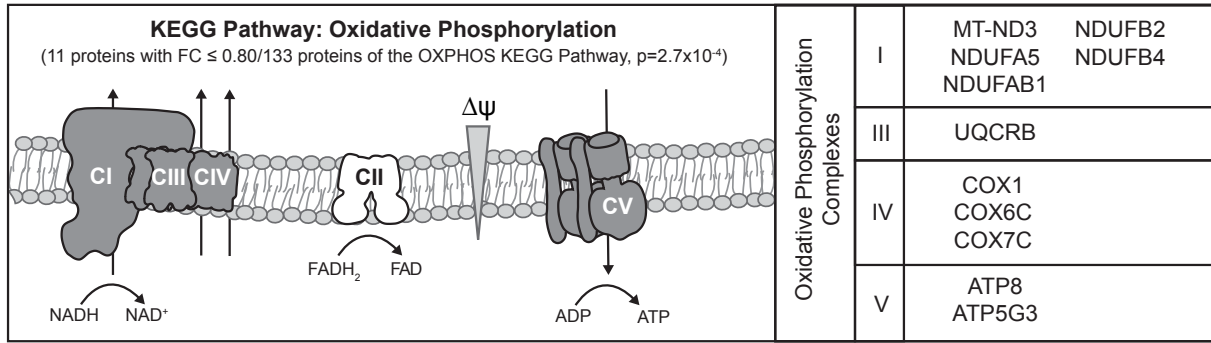

**Figure S3. The oxidative phosphorylation (OXPHOS) KEGG pathway is the most significant KEGG pathway enriched for proteins with a FC  $\leq 0.80$  that references mitochondria and or OXPHOS.** Of the 133 genes in the OXPHOS KEGG pathway 11 encode proteins with a FC  $\leq 0.80$  in  $TAZ^{\Delta 45}$  cells; half ( $n=5$ ) are subunits of complex I (CI) and the remaining ( $n=6$ ) are subunits of complex III, IV, and V.

**Table S3. Proteomics quantification of all complex I (CI) associated proteins.**

| UniProt Entry                     | Gene Name               | Module    | Protein                                                                        | #PSMs*    | Unique Peptides | FC           | P-Value      |
|-----------------------------------|-------------------------|-----------|--------------------------------------------------------------------------------|-----------|-----------------|--------------|--------------|
| <b>Complex I Subunits</b>         |                         |           |                                                                                |           |                 |              |              |
| Q9UI09                            | <i>NDUFA12</i>          | N         | NADH dehydrogenase [ubiquinone] 1 alpha subcomplex subunit 12                  | 46        | 8               | 0.973        | 0.93         |
| P28331                            | <i>NDUFS1</i>           | N         | NADH-ubiquinone oxidoreductase 75 kDa subunit, mitochondrial                   | 173       | 39              | 0.864        | 0.28         |
| O75380                            | <i>NDUFS6</i>           | N         | NADH dehydrogenase [ubiquinone] iron-sulfur protein 6, mitochondrial           | 23        | 9               | 0.955        | 0.49         |
| P49821                            | <i>NDUFV1</i>           | N         | NADH dehydrogenase [ubiquinone] flavoprotein 1, mitochondrial                  | 105       | 21              | 0.872        | 0.21         |
| P19404                            | <i>NDUFV2</i>           | N         | NADH dehydrogenase [ubiquinone] flavoprotein 2, mitochondrial                  | 73        | 15              | 0.872        | 0.18         |
| P56181                            | <i>NDUFV3</i>           | N         | NADH dehydrogenase [ubiquinone] flavoprotein 3, mitochondrial                  | 5         | 3               | 1.037        | 0.69         |
| -----                             |                         |           |                                                                                |           |                 |              |              |
| O43678                            | <i>NDUFA2</i>           | N/Q       | NADH dehydrogenase [ubiquinone] 1 alpha subcomplex subunit 2                   | 19        | 4               | 0.862        | 0.15         |
| O43181                            | <i>NDUFS4</i>           | N/Q       | NADH dehydrogenase [ubiquinone] iron-sulfur protein 4, mitochondrial           | 21        | 7               | 0.890        | 0.22         |
| -----                             |                         |           |                                                                                |           |                 |              |              |
| <b>Q16718</b>                     | <b><i>NDUFA5</i></b>    | <b>Q</b>  | <b>NADH dehydrogenase [ubiquinone] 1 alpha subcomplex subunit 5</b>            | <b>33</b> | <b>7</b>        | <b>0.722</b> | <b>0.24</b>  |
| P56556                            | <i>NDUFA6</i>           | Q         | NADH dehydrogenase [ubiquinone] 1 alpha subcomplex subunit 6                   | 27        | 7               | 0.902        | 0.89         |
| O95182                            | <i>NDUFA7</i>           | Q         | NADH dehydrogenase [ubiquinone] 1 alpha subcomplex subunit 7                   | 33        | 9               | 0.834        | 0.21         |
| Q16795                            | <i>NDUFA9</i>           | Q         | NADH dehydrogenase [ubiquinone] 1 alpha subcomplex subunit 9, mitochondrial    | 54        | 18              | 0.970        | 0.99         |
| O75306                            | <i>NDUFS2</i>           | Q         | NADH dehydrogenase [ubiquinone] iron-sulfur protein 2, mitochondrial           | 130       | 22              | 1.018        | 0.95         |
| O75489                            | <i>NDUFS3</i>           | Q         | NADH dehydrogenase [ubiquinone] iron-sulfur protein 3, mitochondrial           | 142       | 18              | 0.953        | 0.53         |
| O75251                            | <i>NDUFS7</i>           | Q         | NADH dehydrogenase [ubiquinone] iron-sulfur protein 7, mitochondrial           | 27        | 6               | 0.873        | 0.94         |
| O00217                            | <i>NDUFS8</i>           | Q         | NADH dehydrogenase [ubiquinone] iron-sulfur protein 8, mitochondrial           | 66        | 9               | 0.959        | 0.46         |
| -----                             |                         |           |                                                                                |           |                 |              |              |
| P03886                            | <i>MTND1</i>            | Pp        | NADH-ubiquinone oxidoreductase chain 1                                         | 4         | 2               | 1.236        | 0.43         |
| P03891                            | <i>MTND2</i>            | Pp        | NADH-ubiquinone oxidoreductase chain 2                                         | 3         | 2               | 1.358        | 0.24         |
| <b>P03897</b>                     | <b><i>MTND3**</i></b>   | <b>Pp</b> | <b>NADH-ubiquinone oxidoreductase chain 3</b>                                  | <b>2</b>  | <b>1</b>        | <b>0.608</b> | <b>0.01</b>  |
| P03923                            | <i>MTND6</i>            | Pp        | NADH-ubiquinone oxidoreductase chain 6                                         | 2         | 1               | 1.391        | 0.45         |
| O95299                            | <i>NDUFA10</i>          | Pp        | NADH dehydrogenase [ubiquinone] 1 alpha subcomplex subunit 10, mitochondrial   | 56        | 17              | 0.957        | 0.82         |
| Q86Y39                            | <i>NDUFA11</i>          | Pp        | NADH dehydrogenase [ubiquinone] 1 alpha subcomplex subunit 11                  | 14        | 3               | 0.84         | 0.20         |
| Q9P0J0                            | <i>NDUFA13</i>          | Pp        | NADH dehydrogenase [ubiquinone] 1 alpha subcomplex subunit 13                  | 20        | 8               | 0.986        | 0.90         |
| O95167                            | <i>NDUFA3</i>           | Pp        | NADH dehydrogenase [ubiquinone] 1 alpha subcomplex subunit 3                   | 17        | 4               | 0.96         | 0.97         |
| P51970                            | <i>NDUFA8</i>           | Pp        | NADH dehydrogenase [ubiquinone] 1 alpha subcomplex subunit 8                   | 31        | 7               | 0.937        | 0.43         |
| O95298                            | <i>NDUFC2</i>           | Pp        | NADH dehydrogenase [ubiquinone] 1 subunit C2                                   | 19        | 6               | 0.808        | 0.10         |
| O43920                            | <i>NDUFS5</i>           | Pp        | NADH dehydrogenase [ubiquinone] iron-sulfur protein 5                          | 29        | 7               | 0.935        | 0.22         |
| -----                             |                         |           |                                                                                |           |                 |              |              |
| P03905                            | <i>MTND4</i>            | Pd        | NADH-ubiquinone oxidoreductase chain 4                                         | 3         | 2               | 1.036        | 0.57         |
| P03915                            | <i>MTND5</i>            | Pd        | NADH-ubiquinone oxidoreductase chain 5                                         | 11        | 3               | 0.977        | 1.00         |
| <b>O14561</b>                     | <b><i>NDUFAB1</i></b>   | <b>Pd</b> | <b>Acyl carrier protein, mitochondrial</b>                                     | <b>6</b>  | <b>2</b>        | <b>0.727</b> | <b>0.46</b>  |
| O75438                            | <i>NDUFB1</i>           | Pd        | NADH dehydrogenase [ubiquinone] 1 beta subcomplex subunit 1                    | 3         | 2               | 0.995        | 0.98         |
| O96000                            | <i>NDUFB10</i>          | Pd        | NADH dehydrogenase [ubiquinone] 1 beta subcomplex subunit 10                   | 40        | 8               | 0.904        | 0.47         |
| Q9NX14                            | <i>NDUFB11</i>          | Pd        | NADH dehydrogenase [ubiquinone] 1 beta subcomplex subunit 11, mitochondrial    | 20        | 3               | 0.863        | 0.10         |
| <b>O95178</b>                     | <b><i>NDUFB2</i></b>    | <b>Pd</b> | <b>NADH dehydrogenase [ubiquinone] 1 beta subcomplex subunit 2</b>             | <b>6</b>  | <b>1</b>        | <b>0.62</b>  | <b>0.12</b>  |
| O43676                            | <i>NDUFB3**</i>         | Pd        | NADH dehydrogenase [ubiquinone] 1 beta subcomplex subunit 3                    | 11        | 3               | 0.864        | 0.05         |
| <b>O95168</b>                     | <b><i>NDUFB4</i></b>    | <b>Pd</b> | <b>NADH dehydrogenase [ubiquinone] 1 beta subcomplex subunit 4</b>             | <b>30</b> | <b>4</b>        | <b>0.762</b> | <b>0.22</b>  |
| O43674                            | <i>NDUFB5</i>           | Pd        | NADH dehydrogenase [ubiquinone] 1 beta subcomplex subunit 5, mitochondrial     | 28        | 6               | 0.918        | 1.00         |
| O95139                            | <i>NDUFB6</i>           | Pd        | NADH dehydrogenase [ubiquinone] 1 beta subcomplex subunit 6                    | 18        | 7               | 1.081        | 0.99         |
| P17568                            | <i>NDUFB7</i>           | Pd        | NADH dehydrogenase [ubiquinone] 1 beta subcomplex subunit 7                    | 11        | 4               | 0.814        | 0.30         |
| O95169                            | <i>NDUFB8</i>           | Pd        | NADH dehydrogenase [ubiquinone] 1 beta subcomplex subunit 8, mitochondrial     | 13        | 4               | 0.911        | 0.25         |
| Q9Y6M9                            | <i>NDUFB9</i>           | Pd        | NADH dehydrogenase [ubiquinone] 1 beta subcomplex subunit 9                    | 38        | 8               | 0.92         | 0.17         |
| -----                             |                         |           |                                                                                |           |                 |              |              |
| <b>Complex I Assembly Factors</b> |                         |           |                                                                                |           |                 |              |              |
| Q9H845                            | <i>ACAD9</i>            |           | Acyl-CoA dehydrogenase family member 9, mitochondrial                          | 80        | 30              | 1.107        | 0.15         |
| Q9GZY4                            | <i>COA1</i>             |           | Cytochrome c oxidase assembly factor 1 homolog                                 | 6         | 4               | 1.119        | 0.78         |
| Q9BQ95                            | <i>ECSIT</i>            |           | Evolutionarily conserved signaling intermediate in Toll pathway, mitochondrial | 12        | 9               | 0.918        | 0.47         |
| Q96CU9                            | <i>FOXRED1</i>          |           | FAD-dependent oxidoreductase domain-containing protein 1                       | 13        | 6               | 0.96         | 0.97         |
| <b>Q9Y375</b>                     | <b><i>NDUFAB1**</i></b> |           | <b>Complex I intermediate-associated protein 30, mitochondrial</b>             | <b>11</b> | <b>8</b>        | <b>0.797</b> | <b>0.004</b> |
| Q8N183                            | <i>NDUFAB2</i>          |           | NADH dehydrogenase [ubiquinone] 1 alpha subcomplex assembly factor 2           | 49        | 13              | 0.855        | 0.35         |
| Q9BU61                            | <i>NDUFAB3</i>          |           | NADH dehydrogenase [ubiquinone] 1 alpha subcomplex assembly factor 3           | 32        | 7               | 0.942        | 0.88         |
| Q9P032                            | <i>NDUFAB4</i>          |           | NADH dehydrogenase [ubiquinone] 1 alpha subcomplex assembly factor 4           | 30        | 10              | 0.952        | 0.30         |
| Q5TEU4                            | <i>NDUFAB5</i>          |           | Arginine-hydroxylase NDUFAB5, mitochondrial                                    | 1         | 1               | 0.98         | 0.73         |
| Q330K2                            | <i>NDUFAB6</i>          |           | NADH dehydrogenase (ubiquinone) complex I, assembly factor 6                   | 1         | 1               | 0.998        | 0.86         |

|        |                 |                                                          |    |    |       |      |
|--------|-----------------|----------------------------------------------------------|----|----|-------|------|
| Q7L592 | <i>NDUFA7</i>   | Protein arginine methyltransferase NDUFA7, mitochondrial | 16 | 10 | 0.95  | 0.99 |
| Q8TB37 | <i>NUBPL</i>    | Iron-sulfur protein NUBPL                                | 7  | 5  | 0.952 | 1.00 |
| Q9NPL8 | <i>TIMMDC1</i>  | Complex I assembly factor TIMMDC1, mitochondrial         | 23 | 8  | 1.118 | 0.02 |
| Q8IUX1 | <i>TMEM126B</i> | Complex I assembly factor TMEM126B, mitochondrial        | 1  | 1  | 0.984 | 0.96 |
| Q9BUB7 | <i>TMEM70</i>   | Transmembrane protein 70, mitochondrial                  | 5  | 3  | 1.063 | 0.84 |

\* Peptide spectral matches

**Font** Subunits or assembly factors with FC  $\leq$  0.80 (n=6)

\*\* Significantly reduced subunits or assembly factors (n=2)

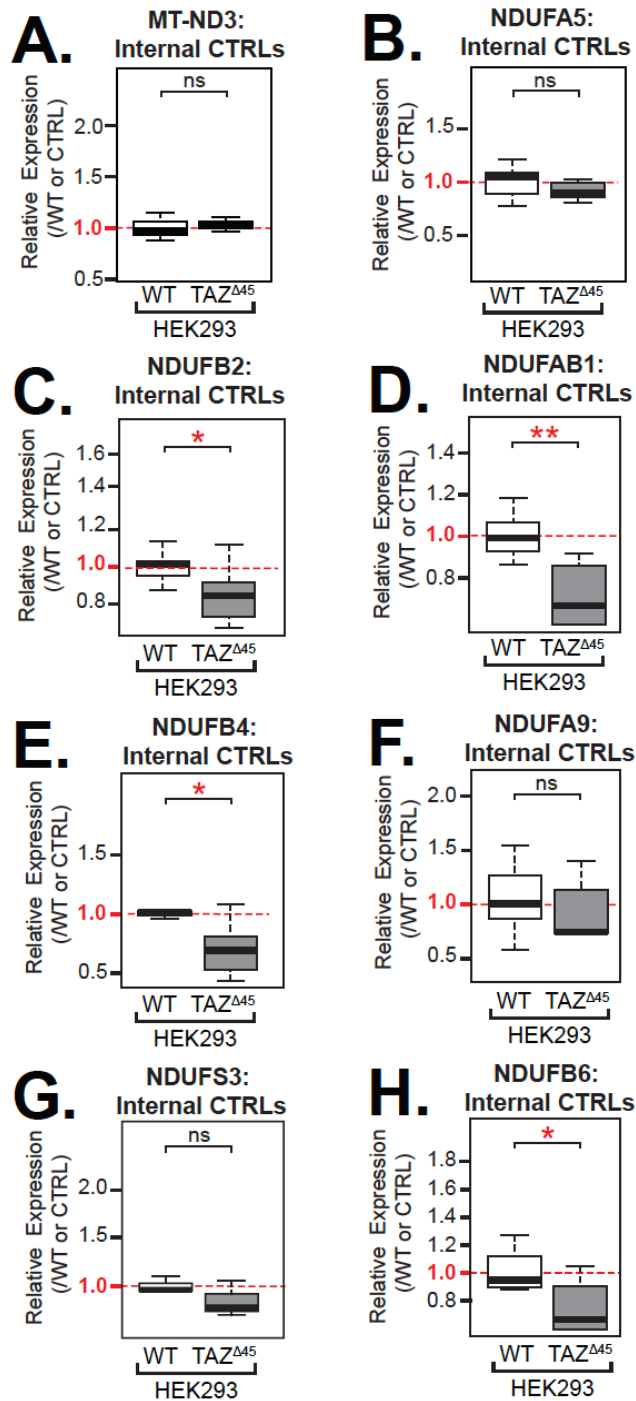

**Figure S4. Relative mRNA expression of complex I (CI) subunits; (A) *MT-ND3* (B) *NDUF5* (C) *NDUFB2* (D) *NDUFAB1* (E) *NDUFB4* (F) *NDUF9* (G) *NDUF3* (H) *NDUF6* determined by qRT-PCR and  $\Delta\Delta C_T$  quantification; WT n=6 (except *MT-ND3* and *NDUF3*, n=3), *TAZ*<sup>Δ45</sup> n=6 (except *MT-ND3* and *NDUF3*, n=3), CTRL n=10 (except *MT-ND3* n=5) Significant differences are indicated; \*  $\leq 0.05$ , \*\*  $\leq 0.005$**

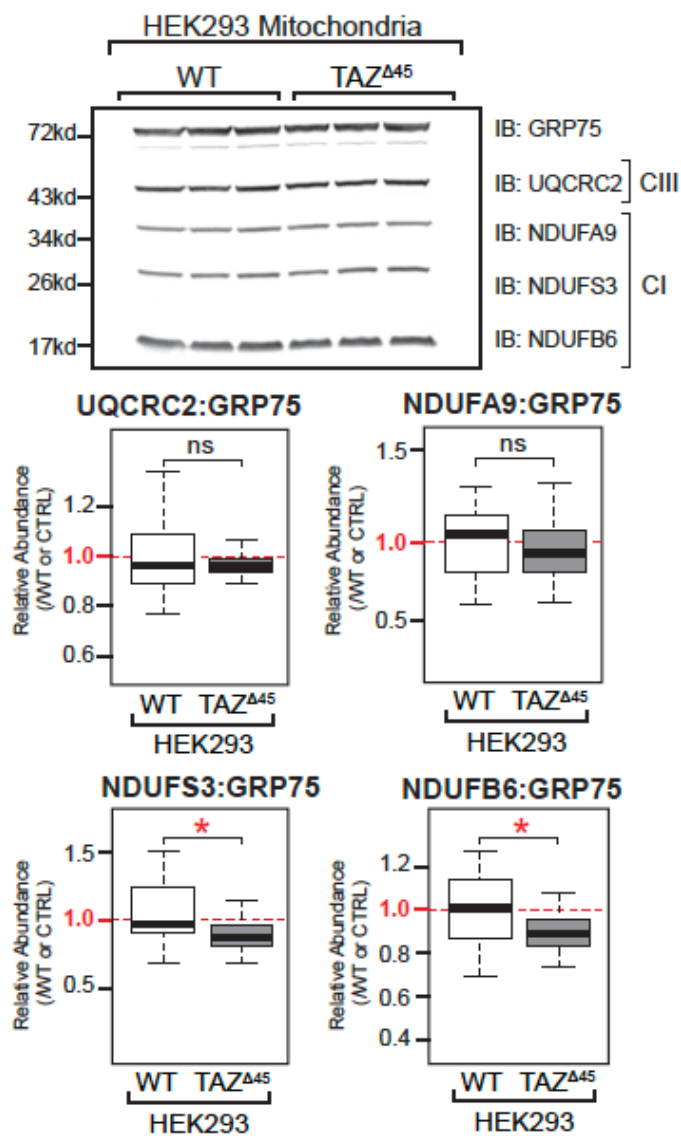

**Figure S5. Immunoblotting of isolated mitochondria for CI and CIII subunits.** Mitochondria (40  $\mu$ g) isolated from the indicated lines were immunoblotted for the indicated proteins. Band intensities, relative to loading control GRP75, were quantified and plotted relative to WT/CTRL abundance; WT n=15, TAZ<sup>Δ45</sup> n=15. Significant differences are indicated; \*  $\leq$  0.05, \*\*  $\leq$  0.005.



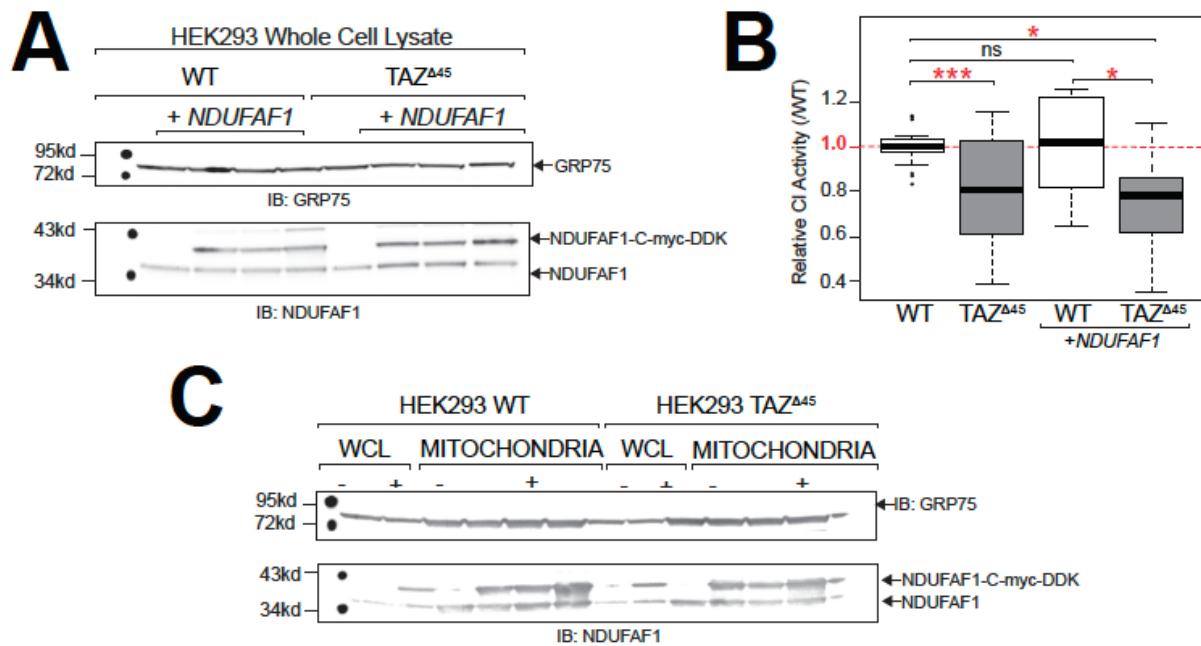

**Figure S6. Overexpression of CI assembly factor NDUFAF1 does not normalize CI activity.** (A) HEK293 WT and TAZ<sup>Δ45</sup> cells were transiently transfected with tagged NDUFAF1 with Lipofectamine 3000 according to manufacturer's instructions. Whole cell extracts (45 μg) of the indicated lines and treatment concentrations were immunoblotted for the indicated proteins. (B) CI activity measured in mitochondria (200 μg total protein). Activity was measured on a microplate reader (450nm) by following the oxidation of NADH to oxidized nicotinamide adenine dinucleotide (NAD<sup>+</sup>). Activity plotted relative to WT abundance; WT n=25, TAZ<sup>Δ45</sup> n=26, WT-transfected n=9, TAZ<sup>Δ45</sup> n=8. (C) HEK293 WT and TAZ<sup>Δ45</sup> cells were transiently transfected with tagged NDUFAF1 with Lipofectamine 3000 according to manufacturer's instructions. Whole cell extracts and isolated mitochondria (45 μg) of the indicated lines and treatment concentrations were immunoblotted for the indicated proteins. Significant differences are indicated; \* ≤ 0.05, \*\* ≤ 0.005, \*\*\* ≤ 0.0005, \*\*\*\* ≤ 0.00005.

**Table S4. Abundance of PARL with CCCP treatment (20uM) at serial time points (Figure 3E).**

| Cell Line                 | Time Point | n# | Relative Abundance (/WT 0 mins) | WT vs. <i>TAZ</i> <sup>Δ45</sup><br>For each time point |
|---------------------------|------------|----|---------------------------------|---------------------------------------------------------|
| WT                        | 0 MIN      | 54 | 1.00                            | p= 1.8 x 10 <sup>-10</sup>                              |
| <i>TAZ</i> <sup>Δ45</sup> |            | 48 | 1.51                            |                                                         |
| WT                        | 10 MIN     | 5  | 1.13                            | p= 1.3 x 10 <sup>-3</sup>                               |
| <i>TAZ</i> <sup>Δ45</sup> |            | 5  | 1.48                            |                                                         |
| WT                        | 30 MIN     | 6  | 1.11                            | p= 2.5 x 10 <sup>-3</sup>                               |
| <i>TAZ</i> <sup>Δ45</sup> |            | 5  | 1.44                            |                                                         |
| WT                        | 60 MIN     | 6  | 1.14                            | p= 6.4 x 10 <sup>-3</sup>                               |
| <i>TAZ</i> <sup>Δ45</sup> |            | 5  | 1.44                            |                                                         |
| WT                        | 90 MIN     | 5  | 0.99                            | p= 5.7 x 10 <sup>-5</sup>                               |
| <i>TAZ</i> <sup>Δ45</sup> |            | 5  | 1.38                            |                                                         |
| WT                        | 120 MIN    | 6  | 1.14                            | ns                                                      |
| <i>TAZ</i> <sup>Δ45</sup> |            | 6  | 1.42                            |                                                         |

**Table S5. Percent of PGAM5 cleavage with CCCP treatment (20uM) at serial time points (Figure 3D).**

| Cell Line                 | Time Point | n# | Percent (%) Cleaved PGAM5 | WT vs. <i>TAZ</i> <sup>Δ45</sup> For each time point | Difference (%) in Percent Cleaved |
|---------------------------|------------|----|---------------------------|------------------------------------------------------|-----------------------------------|
| WT                        | 0 MIN      | 41 | 12                        | p= 1.5 x 10 <sup>-7</sup>                            | 11                                |
| <i>TAZ</i> <sup>Δ45</sup> |            | 41 | 23                        |                                                      |                                   |
| WT                        | 10 MIN     | 8  | 11                        | ns                                                   | 9                                 |
| <i>TAZ</i> <sup>Δ45</sup> |            | 8  | 20                        |                                                      |                                   |
| WT                        | 30 MIN     | 8  | 18                        | p= 0.001                                             | 15                                |
| <i>TAZ</i> <sup>Δ45</sup> |            | 7  | 33                        |                                                      |                                   |
| WT                        | 60 MIN     | 8  | 29                        | p= 3.0 x 10 <sup>-5</sup>                            | 16                                |
| <i>TAZ</i> <sup>Δ45</sup> |            | 5  | 45                        |                                                      |                                   |
| WT                        | 90 MIN     | 5  | 39                        | p= 2.4 x 10 <sup>-4</sup>                            | 18                                |
| <i>TAZ</i> <sup>Δ45</sup> |            | 7  | 57                        |                                                      |                                   |
| WT                        | 120 MIN    | 7  | 49                        | p= 7.5 x 10 <sup>-5</sup>                            | 18                                |
| <i>TAZ</i> <sup>Δ45</sup> |            | 7  | 67                        |                                                      |                                   |

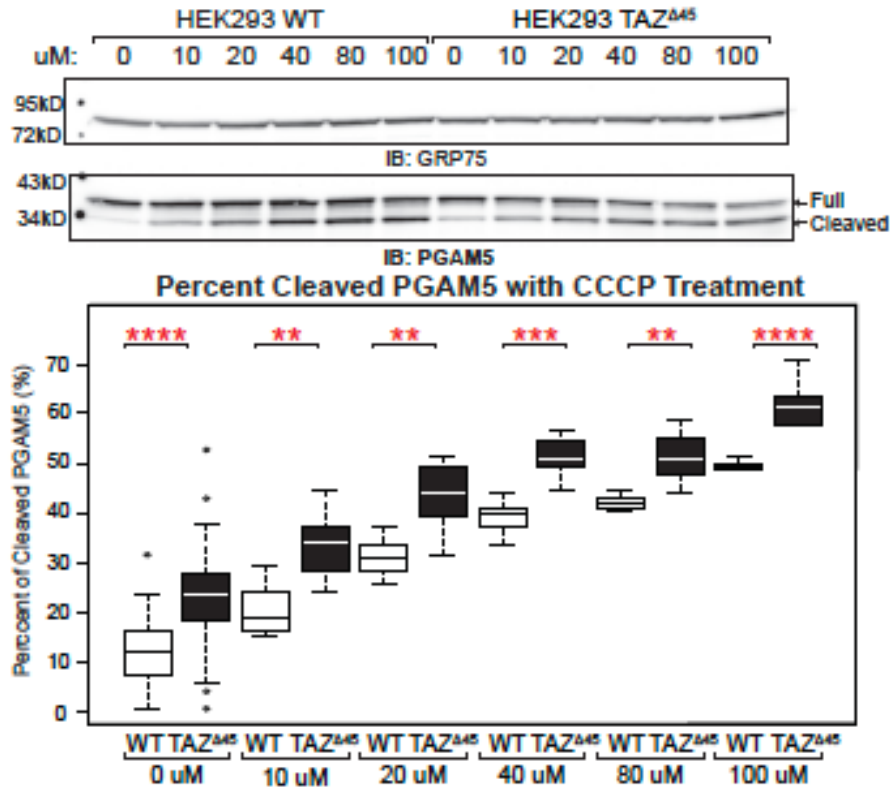

**Figure S7. Increased PGAM5 cleavage with increasing levels of CCCP concentration in *TAZ*<sup>Δ45</sup> cells.** HEK293 WT and *TAZ*<sup>Δ45</sup> cells were treated for 45 minutes with the indicated concentrations. Whole cell extracts (45 μg) of the indicated lines and treatment concentrations were immunoblotted for the indicated proteins. Band intensities, relative to the loading control GRP75, for both full-length and cleaved PGAM5 were individually quantified and plotted as the percent of cleaved PGAM5 (cleaved/full+cleaved); WT n=18, *TAZ*<sup>Δ45</sup> n=18, per treatment. Significant differences are indicated; \* ≤ 0.05, \*\* ≤ 0.005, \*\*\* ≤ 0.0005, \*\*\*\* ≤ 0.00005.

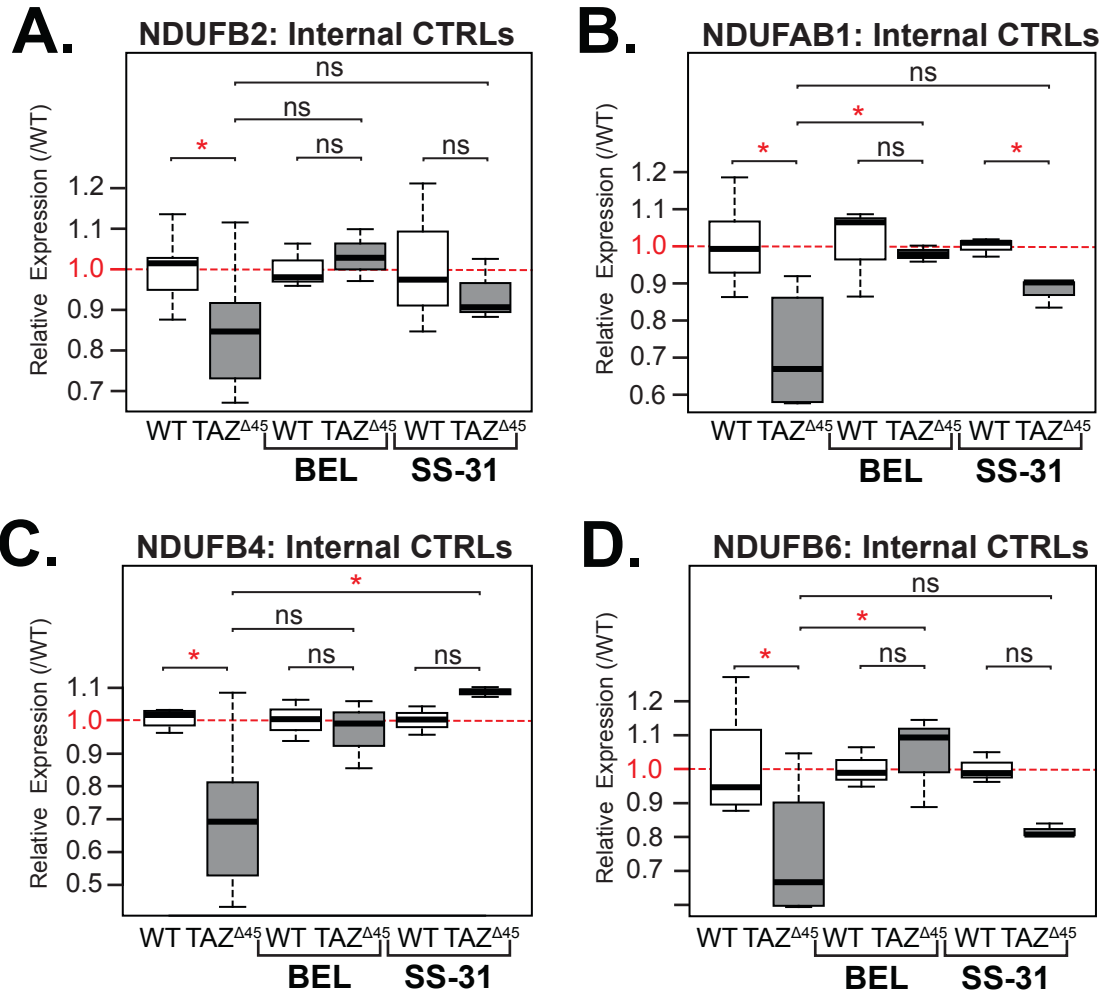

**Figure S8. Relative mRNA expression of (A) *NDUFB2* (B) *NDUFAB1* (C) *NDUFB4* and (D) *NDUFB6* after treatment with BEL and SS-31.** Expression determined by qRT-PCR and  $\Delta\Delta C_T$  quantification using each respective control; WT n=6, TAZ<sup>Δ45</sup> n=3, WT-BEL n=3, TAZ<sup>Δ45</sup>-BEL n=3, WT-SS-31 n=3, TAZ<sup>Δ45</sup>-SS-31 n=3 per gene. Significant differences are indicated; \*  $\leq 0.05$ , \*\*  $\leq 0.005$ , \*\*\*  $\leq 0.0005$ , \*\*\*\*  $\leq 0.00005$ .

**Table S6. Primers used for qRT-PCR.**

| Gene           |         | Sequence (5' – 3')         |
|----------------|---------|----------------------------|
| <i>TBP</i>     | Forward | GAGCTGTGATGTGAAGTTTCC      |
|                | Reverse | TCTGGGTTTGATCATTCTGTAG     |
| <i>HPRT1</i>   | Forward | TGAGGATTTGAAAGGGTGT        |
|                | Reverse | GAGCACACAGAGGGCTACAA       |
| <i>NDUFA9</i>  | Forward | CGCATGGGGTCACAGGTAAT       |
|                | Reverse | CTCGCGTCCCATTCCAGAAA       |
| <i>NDUFS3</i>  | Forward | TACACAGATGAGCTGACGCC       |
|                | Reverse | TCCAAACATGTCCCAGATCTCC     |
| <i>MT-ND3</i>  | Forward | ACTACCACAACCTCAACGGCT      |
|                | Reverse | GCGGGGGATATAGGGTCGAA       |
| <i>NDUFB4</i>  | Forward | CATGGGAGCTCTGTGTGGAT       |
|                | Reverse | TTCTTTCCTATCCCTCTCAGTTTT   |
| <i>NDUFAB1</i> | Forward | GCCGCCAGTATAGCGACAT        |
|                | Reverse | CCAAACTGTCTAAGCCCAGGT      |
| <i>NDUFA5</i>  | Forward | GCGGGTGTGCTGAAGAAGA        |
|                | Reverse | TTCCGCTTTAACCATAGCCAG      |
| <i>NDUFB2</i>  | Forward | GAACTCGCTCTGGAACACCT       |
|                | Reverse | ACTGCTGAAGATGGTGGAGT       |
| <i>NDUFB6</i>  | Forward | TCCATGGGGTATACAAAAGAG      |
|                | Reverse | GGAAATTCCTTCATTGGTGA       |
| <i>NDUFAF1</i> | Forward | GGCAGGAGGTCAAGATTCCTT      |
|                | Reverse | AGCCAAGGTGAATCCTATAGAAGAG  |
| <i>PARL</i>    | Forward | CGCCATGGATACAGCAGGA        |
|                | Reverse | CACTAGCGGCTCCCTGTTCTT      |
| <i>MT-RNR1</i> | Forward | TAGAGGAGCCTGTTCTGTAATCGAT  |
|                | Reverse | CGACCCTTAAGTTTCATAAGGGCTA  |
| <i>MT-CO1</i>  | Forward | GACGTAGACACACGAGCATATTTCA  |
|                | Reverse | AGGACATAGTGAAGTGAGCTACAAC  |
| <i>MT-ATP6</i> | Forward | TAGCCATACACAACACTAAAGGACGA |
|                | Reverse | GGGCATTTTTAATCTTAGAGCGAAA  |
